# Supplementary material for: The Prevalence of Amnestic and Non-Amnestic Mild Cognitive Impairment and Its Association with Different Lifestyle Factors in a South Italian Elderly Population
Source: MDPI journal article supplement (doi:10.3390/ijerph19053097), 2022-03-06
Supplement: s1 [file s1]

**Table S1.** Mean Scores and Standard Deviations or Frequencies on the Variables Included in the Logistic Regression Models for the Three Elderly Groups, and Statistical Tests for Their Differences.

|                                                   | Healthy Elderly<br>(N = 738) | amnesic MCI<br>(N = 62) | non amnesic MCI<br>(N = 39) | F o $\chi^2$ | p     | Post hoc          |
|---------------------------------------------------|------------------------------|-------------------------|-----------------------------|--------------|-------|-------------------|
| Age                                               | 72.36 $\pm$ 6.44             | 75.87 $\pm$ 6.56        | 75.13 $\pm$ 6.68            | 11.16        | <.001 | HE < aMCI = naMCI |
| Sex (F/M)                                         | 403/335                      | 39/23                   | 25/14                       | 2.78         | .250  |                   |
| Education                                         | 9.44 $\pm$ 4.78              | 6.23 $\pm$ 3.39         | 6.77 $\pm$ 4.58             | 18.38        | <.001 | HE > aMCI = naMCI |
| Depression level                                  | 2.74 $\pm$ 2.58              | 3.45 $\pm$ 3.28         | 3.37 $\pm$ 2.16             | 2.88         | 0.057 | HE = aMCI = naMCI |
| Familiarity with AD                               | 630/71                       | 47/11                   | 36/3                        | 6.96         | 0.031 | HE < aMCI = naMCI |
| Traumatic brain injuries (TBI)                    | 673/49                       | 55/4                    | 36/2                        | 0.134        | 0.935 | HE = aMCI = naMCI |
| Perceived Physical Pain                           | 4.00 $\pm$ 1.01              | 3.65 $\pm$ 1.07         | 3.79 $\pm$ 1.13             | 3.50         | 0.036 | HE < aMCI = naMCI |
| Smoking                                           | 371/274/91                   | 41/14/6                 | 19/17/2                     | 8.70         | 0.069 | HE < aMCI = naMCI |
| Alcohol                                           | 649/62/12/2                  | 57/3/1                  | 35/1/2                      | 4.23         | 0.835 | HE = aMCI = naMCI |
| Waist-Hip Ratio (WHR)                             | 0.91 $\pm$ 0.12              | 0.88 $\pm$ 0.12         | 0.93 $\pm$ 0.12             | 2.32         | 0.107 | HE = aMCI = naMCI |
| Body Mass Index (BMI)                             | 27.1 $\pm$ 4.38              | 26.9 $\pm$ 3.92         | 28.9 $\pm$ 5.11             | 2.26         | 0.113 | HE = aMCI = naMCI |
| Second language                                   | 537/201                      | 52/10                   | 33/6                        | 6.02         | 0.049 | HE < aMCI = naMCI |
| Physical activities                               | 1.14 $\pm$ 1.67              | 0.48 $\pm$ 1.27         | 0.82 $\pm$ 1.54             | 7.60         | 0.001 | HE < aMCI = naMCI |
| Cultural activities                               | 0.80 $\pm$ 1.10              | 0.43 $\pm$ 0.99         | 0.54 $\pm$ 0.97             | 4.91         | 0.010 | HE < aMCI = naMCI |
| Intellectual activities                           | 2.98 $\pm$ 1.97              | 1.67 $\pm$ 1.94         | 2.08 $\pm$ 2.11             | 15.4         | <.001 | HE < aMCI = naMCI |
| Productive activities                             | 3.41 $\pm$ 1.19              | 3.52 $\pm$ 1.97         | 3.44 $\pm$ 1.90             | 0.10         | 0.903 | HE = aMCI = naMCI |
| Social activities                                 | 3.38 $\pm$ 1.42              | 3.52 $\pm$ 1.49         | 4.08 $\pm$ 1.26             | 1.99         | 0.144 | HE = aMCI = naMCI |
| Quality of life – physical health                 | 15.4 $\pm$ 2.86              | 14.4 $\pm$ 3.15         | 14.8 $\pm$ 2.81             | 3.63         | 0.032 | HE < aMCI = naMCI |
| Quality of life – mental health                   | 21.2 $\pm$ 3.94              | 20.02 $\pm$ 5.02        | 21.8 $\pm$ 3.66             | 1.76         | 0.179 | HE = aMCI = naMCI |
| Sleep quality                                     | 6.73 $\pm$ 2.11              | 7.26 $\pm$ 2.09         | 6.64 $\pm$ 2.29             | 1.89         | 0.158 | HE = aMCI = naMCI |
| Topographical disorientation self-report          | 5.25 $\pm$ 4.27              | 4.25 $\pm$ 4.39         | 5.82 $\pm$ 4.24             | 1.86         | 0.164 | HE = aMCI = naMCI |
| Topographical disorientation egocentric component | 5.93 $\pm$ 2.00              | 4.56 $\pm$ 2.02         | 5.84 $\pm$ 1.57             | 11.00        | <.001 | HE < aMCI = naMCI |

|                                                      |             |             |             |       |       |                   |
|------------------------------------------------------|-------------|-------------|-------------|-------|-------|-------------------|
| Topographical disorientation allocentric component   | 5.38 ± 2.19 | 3.96 ± 1.92 | 5.05 ± 2.45 | 12.9  | <.001 | HE < aMCI = naMCI |
| Topographical disorientation total                   | 11.3 ± 3.59 | 8.52 ± 3.29 | 10.9 ± 3.36 | 17.00 | <.001 | HE < aMCI < naMCI |
| Food group 1 (carbohydrates)                         | 2.99 ± 0.68 | 3.10 ± 0.62 | 2.90 ± 0.68 | 1.21  | 0.304 | HE = aMCI = naMCI |
| Food group 2 (cured and smoked meats)                | 1.54 ± 0.80 | 1.58 ± 0.93 | 1.46 ± 0.79 | 0.24  | 0.789 | HE = aMCI = naMCI |
| Food group 3 (white meat)                            | 1.74 ± 0.68 | 1.69 ± 0.67 | 1.79 ± 0.52 | 0.39  | 0.676 | HE = aMCI = naMCI |
| Food group 4 (red meat)                              | 1.46 ± 0.71 | 1.62 ± 0.71 | 1.54 ± 0.76 | 1.69  | 0.192 | HE = aMCI = naMCI |
| Food group 5 (milk)                                  | 2.23 ± 1.31 | 2.16 ± 1.25 | 2.05 ± 1.39 | 0.38  | 0.689 | HE = aMCI = naMCI |
| Food group 6 (dairy products and cheeses)            | 2.01 ± 0.79 | 1.80 ± 0.75 | 1.97 ± 0.74 | 2.20  | 0.119 | HE = aMCI = naMCI |
| Food group 7 (eggs)                                  | 1.52 ± 0.63 | 1.62 ± 0.59 | 1.51 ± 0.60 | 0.69  | 0.503 | HE = aMCI = naMCI |
| Food group 8 (fish meat)                             | 1.71 ± 0.57 | 1.64 ± 0.55 | 1.74 ± 0.44 | 0.59  | 0.553 | HE = aMCI = naMCI |
| Food group 9 (raw and cooked vegetables with leaves) | 2.47 ± 0.81 | 2.36 ± 0.73 | 2.38 ± 0.82 | 0.79  | 0.475 | HE = aMCI = naMCI |
| Food group 10 (vegetables and legumes)               | 2.47 ± 0.78 | 2.33 ± 0.72 | 2.38 ± 7.47 | 1.17  | 0.318 | HE = aMCI = naMCI |
| Food group 11 (fruit)                                | 3.51 ± 0.69 | 3.33 ± 0.93 | 3.44 ± 0.64 | 1.33  | 0.272 | HE = aMCI = naMCI |
| Water                                                | 3.46 ± 0.65 | 3.52 ± 0.59 | 3.47 ± 0.69 | 0.37  | 0.691 | HE = aMCI = naMCI |
| Carbonated drinks                                    | 0.44 ± 0.64 | 0.43 ± 0.59 | 0.32 ± 0.47 | 1.28  | 0.284 | HE = aMCI = naMCI |
| Beer                                                 | 0.54 ± 0.58 | 0.45 ± 0.62 | 0.37 ± 0.54 | 2.17  | 0.122 | HE = aMCI = naMCI |
| Wine                                                 | 1.08 ± 0.91 | 1.21 ± 0.89 | 1.05 ± 0.89 | 0.52  | 0.590 | HE = aMCI = naMCI |

Abbreviations: aMCI: amnesic MCI; naMCI: non amnesic MCI; F: Female; M: Male.
